# Supplementary material
Source: PubMed Central journal article supplement (PMC10901404)
Supplement: NIHPP2023.09.29.560183v2-supplement-1.pdf [file NIHPP2023.09.29.560183v2-supplement-1.pdf]

Resident Synovial Macrophages in Synovial Fluid

665 **Supplementary Table 1:** Flow cytometry panel, initial (top) and modified (bottom). Mac  
 666 = macrophage; Mono = monocyte; OB = osteoblast; RSM = Resident Synovial  
 667 Macrophage; APC = Antigen Presenting Cell

668

| Molecular Target | Fluorochrome   | Clone  | Vendor       | Cell of Interest     |
|------------------|----------------|--------|--------------|----------------------|
| CD11b            | BV605          | ICRF44 | BioLegend    | Myeloid              |
| CD11c            | BV785          | 3.9    | BioLegend    | Dendritic Cell       |
| CD14             | PE-Cy7         | 63D3   | BioLegend    | Mac/Mono             |
| CD20             | BV785          | 2H7    | BioLegend    | B cell               |
| CD3              | BV650          | UCHT1  | BioLegend    | T Cell               |
| CD45             | AF700          | 2D1    | BioLegend    | Leukocytes           |
| CD56             | PE-Cy5         | 5.1H11 | BioLegend    | NK cell              |
| CD68             | PerCP-Cy5.5    | Y1/82A | BioLegend    | Macrophage           |
| CX3CR1           | BV421          | 2A9-1  | BioLegend    | RSM/Mac/Mono         |
| HLA-DR           | PE             | Tu36   | BioLegend    | Activated APC        |
| OPG/TNFRSF11B    | AF488          | 155321 | R&D Systems  | RSM                  |
| RANKL/TNFSF11    | AF350          | 685857 | R&D Systems  | OB/activated T cells |
| TREM2            | APC            | 237920 | R&D Systems  | Macrophage           |
| Viability        | Live/Dead Aqua |        | Thermofisher |                      |

669

| Molecular Target | Fluorochrome   | Clone      | Vendor         | Cell of Interest |
|------------------|----------------|------------|----------------|------------------|
| CD11b            | BV605          | ICRF44     | BioLegend      | Myeloid          |
| CD11c            | BV785          | 3.9        | BD Biosciences | Dendritic Cell   |
| CD14             | Spark Blue 550 | 63D3       | BioLegend      | Mac/Mono         |
| CD20             | BV785          | 2H7        | BD Biosciences | B cell           |
| CD3              | BV510          | SK7        | BioLegend      | T Cell           |
| CD45             | AF700          | HI30       | BioLegend      | Leukocytes       |
| CD56             | PE-Cy5         | 5.1H11     | BioLegend      | NK cell          |
| CD66b            | PE             | MIH24      | BioLegend      | Neutrophil       |
| CD68             | R718           | Y1/82A     | BD Biosciences | Macrophage       |
| CX3CR1           | BV711          | 2A9-1      | BioLegend      | RSM/Mac/Mono     |
| F11R/JAM-1/JAM-A | BV421          | M.Ab.F11   | BD Biosciences | RSM              |
| OPG/TNFRSF11B    | AF488          | 155321     | R&D Systems    | RSM              |
| TREM2            | APC            | 237920     | R&D Systems    | Macrophage       |
| ZO-1/TJP1        | Coralite 594   | polyclonal | ThermoFisher   | RSM              |
| Viability        | Live/Dead Blue |            | ThermoFisher   |                  |

670

671

672

673 **Supplemental Table 2: Patient Demography.** Arthritis Type was determined by  
 674 synovial fluid WBC count per mm<sup>3</sup>, %PMNs, and/or culture results. \* = 3 patients had  
 675 Lyme Arthritis, 1 of which had both a *S. aureus* and positive IgG with confirmatory  
 676 Western Blot.  
 677

| <b>Demographics</b>       |                         | n=52           |
|---------------------------|-------------------------|----------------|
| <b>Age</b>                | (years)                 |                |
|                           | Mean (STD)              | 51.7 (21)      |
|                           | Median                  | 58             |
|                           | Range                   | 3-77           |
| <b>Gender</b>             | n, (%)                  |                |
|                           | Male                    | 35 (68)        |
|                           | Female                  | 17 (32)        |
| <b>Race and Ethnicity</b> | n, (%); Hispanic n, (%) |                |
|                           | White                   | 45 (87); 1 (2) |
|                           | Black                   | 3 (6); 0       |
|                           | Asian                   | 1 (2); 0       |
|                           | Multiracial             | 1 (2); 0       |
|                           | Unknown                 | 1 (2); 0       |
| <b>Arthritis Type</b>     | n (%)                   |                |
|                           | Normal/Non-I            | 9 (25)         |
|                           | Inflammatory            | 8 (22)         |
|                           | Septic*                 | 18 (50)        |
|                           | Hemorrhagic             | 1 (3)          |

678

679

680

Resident Synovial Macrophages in Synovial Fluid

681 **Supplementary Table 3:** Patient Diagnosis. SF analysis was performed on patients  
 682 when it was clinically indicated. SF diagnosis was based on WBC count (# nucleated  
 683 cells) and % PMN based on neutrophil count. \* = not performed. \*\* = Lyme Arthritis in  
 684 addition to other bacterial arthritis.

| Patient | Color       | Clarity       | Crystals | # Nucleated Cells | # Neutrophils | # Lymphocytes | Arthritis Type   |
|---------|-------------|---------------|----------|-------------------|---------------|---------------|------------------|
| 2       | Red         | Turbid        | CCP, MSU | 29783             | 22635         | 101           | Inflammatory     |
| 3       | Yellow      | Turbid        | CPP      | 4716              | 2453          | 20            | Inflammatory     |
| 5       | Red         | Turbid        | none     | 822               | 674           | 107           | Non-Inflammatory |
| 6       | Yellow      | Turbid        | none     | 29497             | 28022         | 0             | Septic           |
| 7       | Yellow      | Hazy          | none     | 714               | 29            | 64            | Non-Inflammatory |
| 9       | Yellow      | Hazy          | none     | 63726             | 60539         | 1275          | Septic           |
| 10      | Yellow      | Slightly Hazy | none     | 464               | 28            | 70            | Non-Inflammatory |
| 11      | Red         | Turbid        | none     | 671               | 658           | 0             | Non-Inflammatory |
| 13      | Orange      | Hazy          | none     | 831               | 632           | 58            | Non-Inflammatory |
| 14      | None        | Clear         | none     | 29                | 0             | 7             | Normal           |
| 15      | Orange      | Turbid        | none     | 63184             | 60025         | 632           | Inflammatory     |
| 16      | Pink        | Hazy          | none     | 166627            | 128303        | 9998          | Septic           |
| 18      | Amber       | Turbid        | none     | 134280            | 119509        | 2686          | Septic           |
| 19      | Red         | Turbid        | none     | 11522             | 8987          | 1959          | Inflammatory     |
| 21      | N/A         | N/A           | none     | N/A               | N/A           | N/A           | Septic           |
| 22      | Yellow      | Turbid        | CPP      | 34482             | 27586         | 2             | Inflammatory     |
| 23      | Yellow      | Clear         | none     | 348               | 28            | 52            | Non-Inflammatory |
| 24      | Red         | Turbid        | none     | 1819              | 1564          | 14            | Hemorrhagic      |
| 26      | Yellow      | Clear         | none     | 26                | 5             | 12            | Normal           |
| 27      | Orange      | Turbid        | MSU      | 33805             | 26030         | 0             | Inflammatory     |
| 28      | Brown       | Turbid        | none     | 66945             | *             | *             | Septic           |
| 30      | Yellow      | Slightly Hazy | none     | 26536             | 25209         | 531           | Septic           |
| 31      | Red         | Hazy          | none     | 48363             | 46428         | 484           | Septic           |
| 32      | Orange      | Hazy          | none     | 43355             | 42054         | 434           | Septic           |
| 33      | Red         | Turbid        | none     | 304               | 76            | 85            | Septic           |
| 34      | Red         | Hazy          | none     | 854               | 384           | 154           | Non-Inflammatory |
| 38      | Red         | Turbid        | none     | 114000            | 1000320       | 2             | Septic           |
| 39      | Red         | Turbid        | MSU      | 76890             | 76121         | 0             | Inflammatory     |
| 40      | Pale Yellow | Turbid        | CPP      | 67368             | 64673         | 0             | Inflammatory     |
| 41      | Pink        | Turbid        | None     | 79118             | 75162         | 0             | Septic**         |
| 43      | Orange      | Turbid        | None     | 104595            | 92044         | 2             | Septic           |
| 46      | Pink        | Turbid        | None     | 80562             | 74117         | 2417          | Septic           |
| 47      | Red         | Turbid        | None     | 9884              | 8303          | 692           | Septic           |
| 48      | Orange      | Hazy          | None     | 130               | 83            | 26            | Normal           |
| 49      | Yellow      | Hazy          | MSU      | 20566             | 18715         | 0             | Inflammatory     |

**Supplementary Table 4:** List of all significant conserved genes in RSM, Cytotoxic DC, and NK/NKT clusters.

| Gene     | Log2FC   | $\Delta$ % Septic | $\Delta$ % Inflamm | Cluster      | Gene Function                                                                                                             |
|----------|----------|-------------------|--------------------|--------------|---------------------------------------------------------------------------------------------------------------------------|
| PKIB     | 2.10657  | 0.71              | 0.726              | DC           | Also known as AKT, causes M2 formation                                                                                    |
| SKAP1    | 3.16933  | 0.89              | 0.954              | NK/NKT       | TCR adaptor protein                                                                                                       |
| CD96     | 2.690931 | 0.77              | 0.874              | NK/NKT       | Inhibitory, marker of exhaustion                                                                                          |
| CD2      | 2.571958 | 0.78              | 0.817              | NK/NKT       | Regulates lytic activity                                                                                                  |
| CD247    | 2.473159 | 0.79              | 0.869              | NK/NKT       | Subunit of T cell antigen receptor complex                                                                                |
| ETS1     | 2.430819 | 0.85              | 0.88               | NK/NKT       | Required for NK differentiation and cytotoxic function                                                                    |
| SLC38A1  | 2.222173 | 0.82              | 0.77               | NK/NKT       | Glutamine transporter                                                                                                     |
| IDO1     | 3.679276 | 0.93              | 0.764              | Cytotoxic DC | Immunosuppressive, expressed by DCs, macs, and epithelial cells                                                           |
| C1orf54  | 3.555745 | 0.94              | 0.794              | Cytotoxic DC | cDC1 gene                                                                                                                 |
| CCSER1   | 3.110627 | 0.78              | 0.818              | Cytotoxic DC | upregulated in anti-inflammatory conditions                                                                               |
| CLEC9A   | 3.009585 | 1.00              | 0.888              | Cytotoxic DC | DC receptor for necrotic cell death                                                                                       |
| CPNE3    | 2.908024 | 0.82              | 0.76               | Cytotoxic DC | cDC1 gene                                                                                                                 |
| AUTS2    | 2.836438 | 0.78              | 0.74               | Cytotoxic DC | associated with autism                                                                                                    |
| CADM1    | 2.766723 | 0.99              | 0.936              | Cytotoxic DC | expressed by pre-cDC1, cell adhesion                                                                                      |
| NEGR1    | 2.54191  | 0.97              | 0.798              | Cytotoxic DC | immunoglobulin superfamily cell adhesion molecule subgroup IgLON, has been implicated in neuronal growth and connectivity |
| CLNK     | 2.441584 | 0.99              | 0.885              | Cytotoxic DC | upregulated in response to IL-2 and IL-3, associated with SLP-76                                                          |
| DNASE1L3 | 2.326661 | 0.89              | 0.998              | Cytotoxic DC | Cytokine secretion following inflammasome activation in response to DNA in circulating apoptotic bodies                   |
| ARL4C    | 2.315802 | 0.71              | 0.709              | Cytotoxic DC | oncogene, tubulogenesis, wnt-beta catenin signaling                                                                       |
| NAAA     | 2.166039 | 0.71              | 0.78               | Cytotoxic DC | inflammatory, lysosomal                                                                                                   |
| KIF16B   | 1.944567 | 0.79              | 0.778              | Cytotoxic DC | microtubule formation associated with endosomes and cross presentation                                                    |
| DST      | 1.91132  | 0.77              | 0.764              | Cytotoxic DC | junctional adhesion protein                                                                                               |
| PLPP1    | 1.872874 | 0.74              | 0.736              | Cytotoxic DC | phospholipid lipase associated with mac inflammation, cDC1 marker                                                         |
| MCOLN2   | 1.841604 | 0.73              | 0.824              | Cytotoxic DC | MHCII presentation, innate immune cell activation, enhances infectivity of certain viruses, interferon stimulating gene   |
| CALCRL   | 1.840268 | 0.76              | 0.951              | Cytotoxic DC | regulates DC function through NF-kB                                                                                       |

## Resident Synovial Macrophages in Synovial Fluid

|         |          |      |       |              |                                                                                                                                                                                                            |
|---------|----------|------|-------|--------------|------------------------------------------------------------------------------------------------------------------------------------------------------------------------------------------------------------|
| TACSTD2 | 1.765963 | 0.78 | 0.989 | Cytotoxic DC | Marker for TGF-B1 dependent DCs                                                                                                                                                                            |
| ZEB1    | 1.672937 | 0.74 | 0.941 | Cytotoxic DC | cDC1 cells                                                                                                                                                                                                 |
| C1orf21 | 1.647088 | 0.84 | 0.9   | Cytotoxic DC | enriched in cytotoxic CD8 T cells                                                                                                                                                                          |
| FLT3    | 1.645133 | 0.96 | 0.895 | Cytotoxic DC | The growth factor Flt3 ligand (Flt3L) is central to dendritic cell (DC) homeostasis and development, controlling survival and expansion by binding to Flt3 receptor tyrosine kinase on the surface of DCs. |
| ENPP1   | 1.548458 | 1.00 | 0.777 | Cytotoxic DC | suppresses innate immune response,                                                                                                                                                                         |
| NUBPL   | 1.540362 | 0.83 | 0.911 | Cytotoxic DC | mitochondrial gene, iron and sulfur                                                                                                                                                                        |
| XCR1    | 1.53506  | 0.78 | 0.995 | Cytotoxic DC | DC, induces CD8 responses                                                                                                                                                                                  |
| DAPP1   | 1.52997  | 0.72 | 0.717 | Cytotoxic DC | immune related mucosal tissues, hyper-reactive airway disease, IDO1/CCR7 signaling, associated with DCs                                                                                                    |
| LAMP3   | 3.181144 | 0.88 | 0.967 | RSM          | lysosome                                                                                                                                                                                                   |
| CST7    | 2.710421 | 0.93 | 0.748 | RSM          | Cistatin F, lysosomal cathepsin inhibitor                                                                                                                                                                  |
| DAPP1   | 2.225168 | 0.72 | 0.781 | RSM          | immune related mucosal tissues, hyper-reactive airway disease, IDO1/CCR7 signaling, associated with DCs                                                                                                    |
| GPR157  | 2.163834 | 0.75 | 0.897 | RSM          | G protein coupled receptor 157                                                                                                                                                                             |
| TBC1D4  | 2.161417 | 0.79 | 0.941 | RSM          | Rab GTPase Activating Protein                                                                                                                                                                              |
| RFTN1   | 2.085313 | 0.77 | 0.736 | RSM          | glucose transport                                                                                                                                                                                          |
| CCR7    | 2.083676 | 0.92 | 0.837 | RSM          | M1 polarization                                                                                                                                                                                            |
| LAD1    | 1.96187  | 0.77 | 0.713 | RSM          | epithelialization                                                                                                                                                                                          |
| SLC41A2 | 1.415962 | 0.76 | 0.78  | RSM          | magnesium transporter                                                                                                                                                                                      |
| REPIN1  | 1.325367 | 0.76 | 0.72  | RSM          | increasing cell size and tumor metastasis                                                                                                                                                                  |
| SPIB    | 1.005641 | 0.75 | 0.726 | RSM          | recruits TAMs via CCL4 signaling                                                                                                                                                                           |

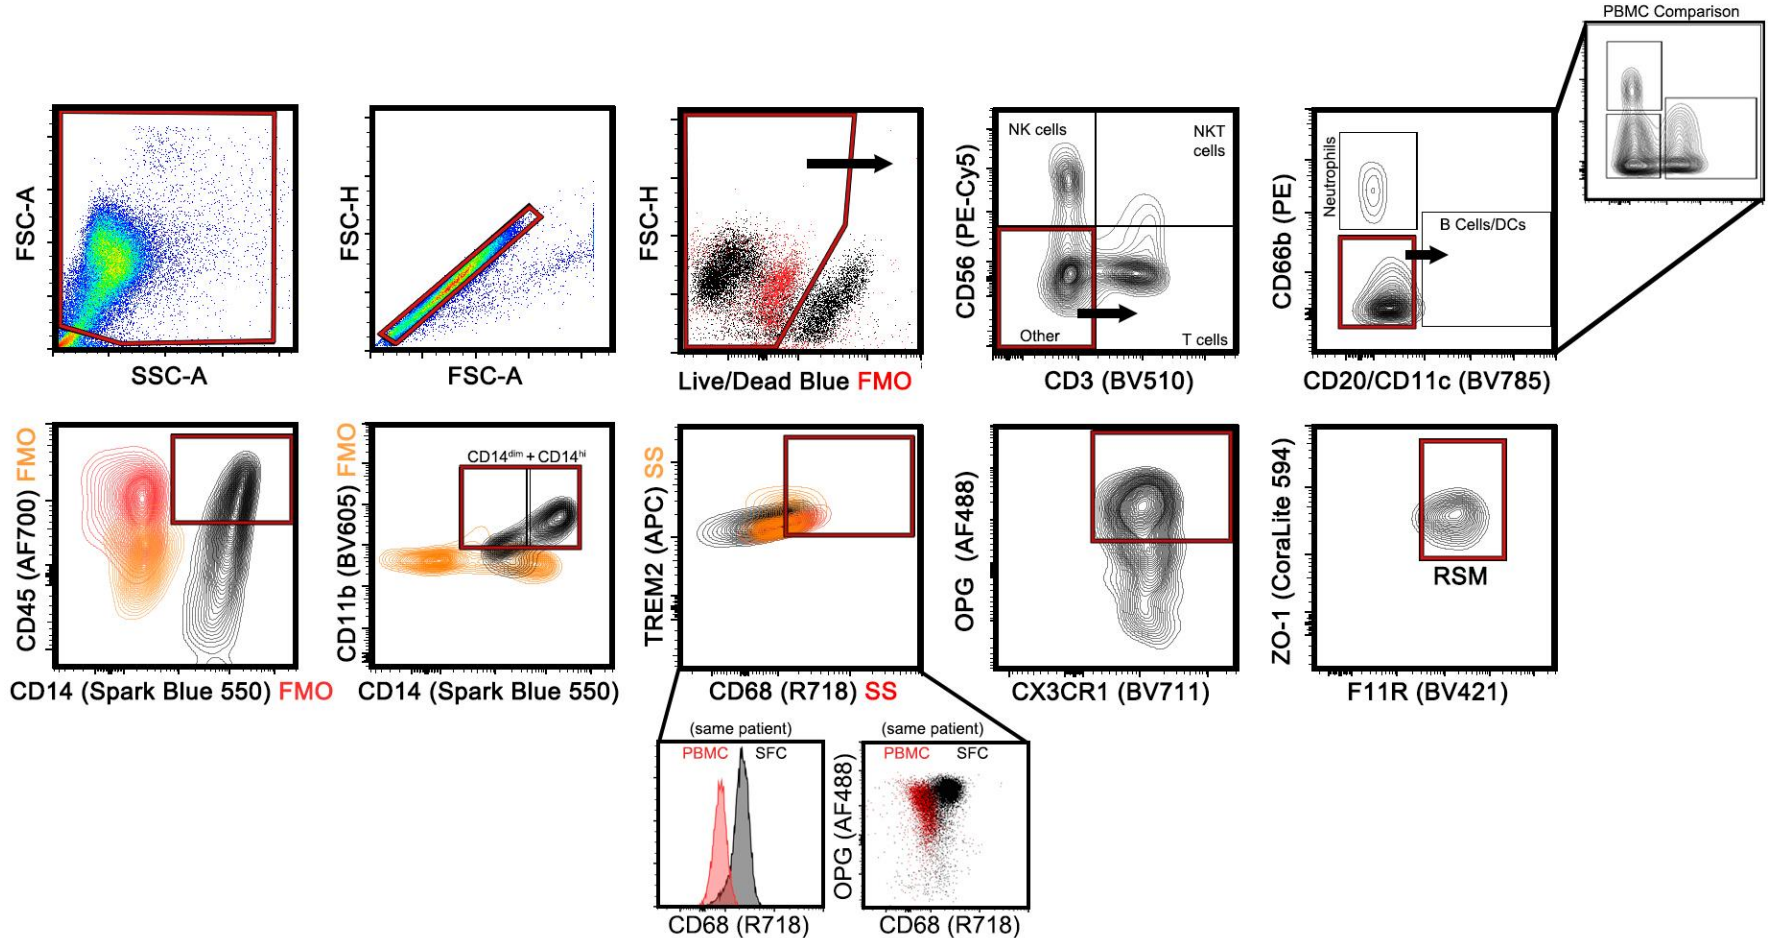

**Supplemental Figure 1:** Final gating strategy to identify TREM2<sup>+</sup>CX3CR1<sup>+</sup>OPG<sup>+</sup>F11R<sup>+</sup>ZO-1<sup>+</sup> macrophages consistent with RSM. FMO and single stain (SS) shown where used to define gates.

## Resident Synovial Macrophages in Synovial Fluid

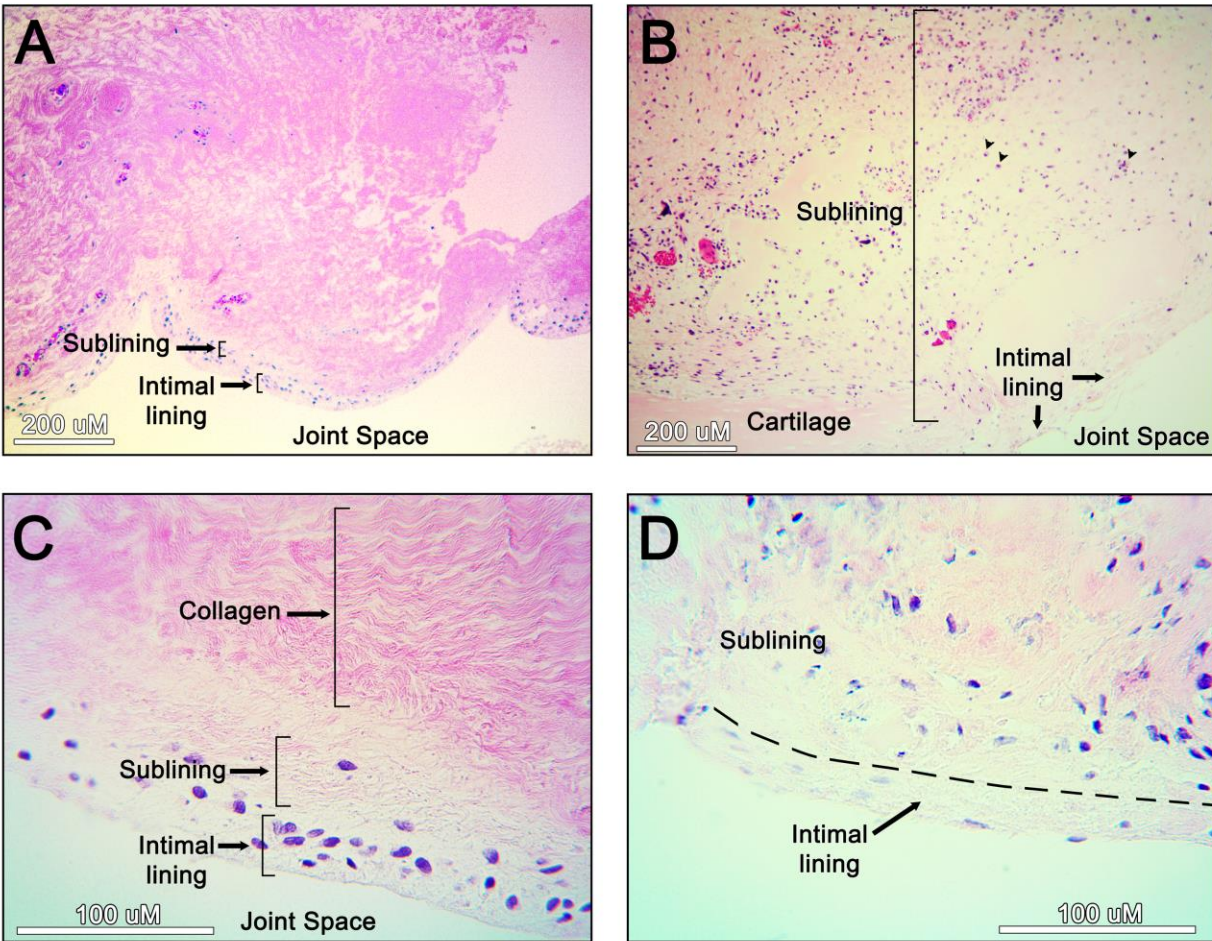

**Supplemental Figure 2:** *In vivo* negative (A, C, same patient, 10X and 40X respectively) and positive (B, D, second patient, 10X and 40X respectively) controls. Negative control patient displays fibrosis, but positive control (chronic bacterial infection) patient has evident dysfunction of synovium with cartilage formation, evident migration of inflammatory cells into the sublining, and thinning/loss of cellularity of the intimal lining (B, D).

## Resident Synovial Macrophages in Synovial Fluid

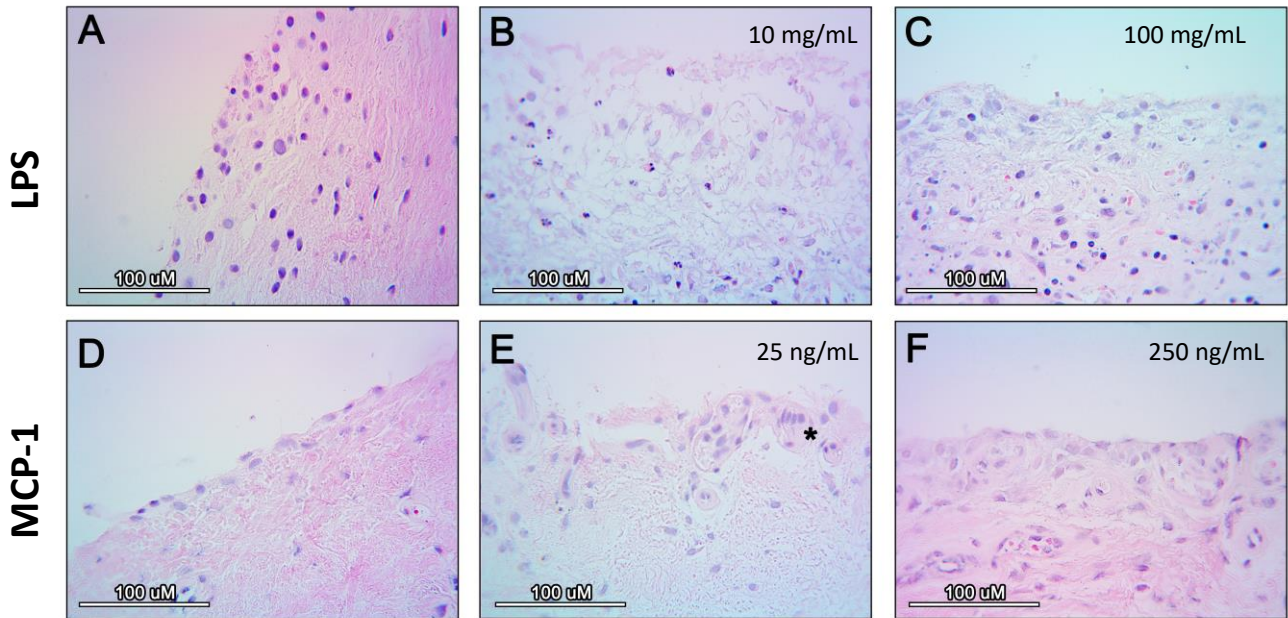

**Supplementary Figure 3:** disruption of the synovial intimal lining and migration of inflammatory cells at 24 hours is dependent upon stimulus dose. A-C are from same patient, D-F are from a second patient, all at 24 hours.



## Resident Synovial Macrophages in Synovial Fluid

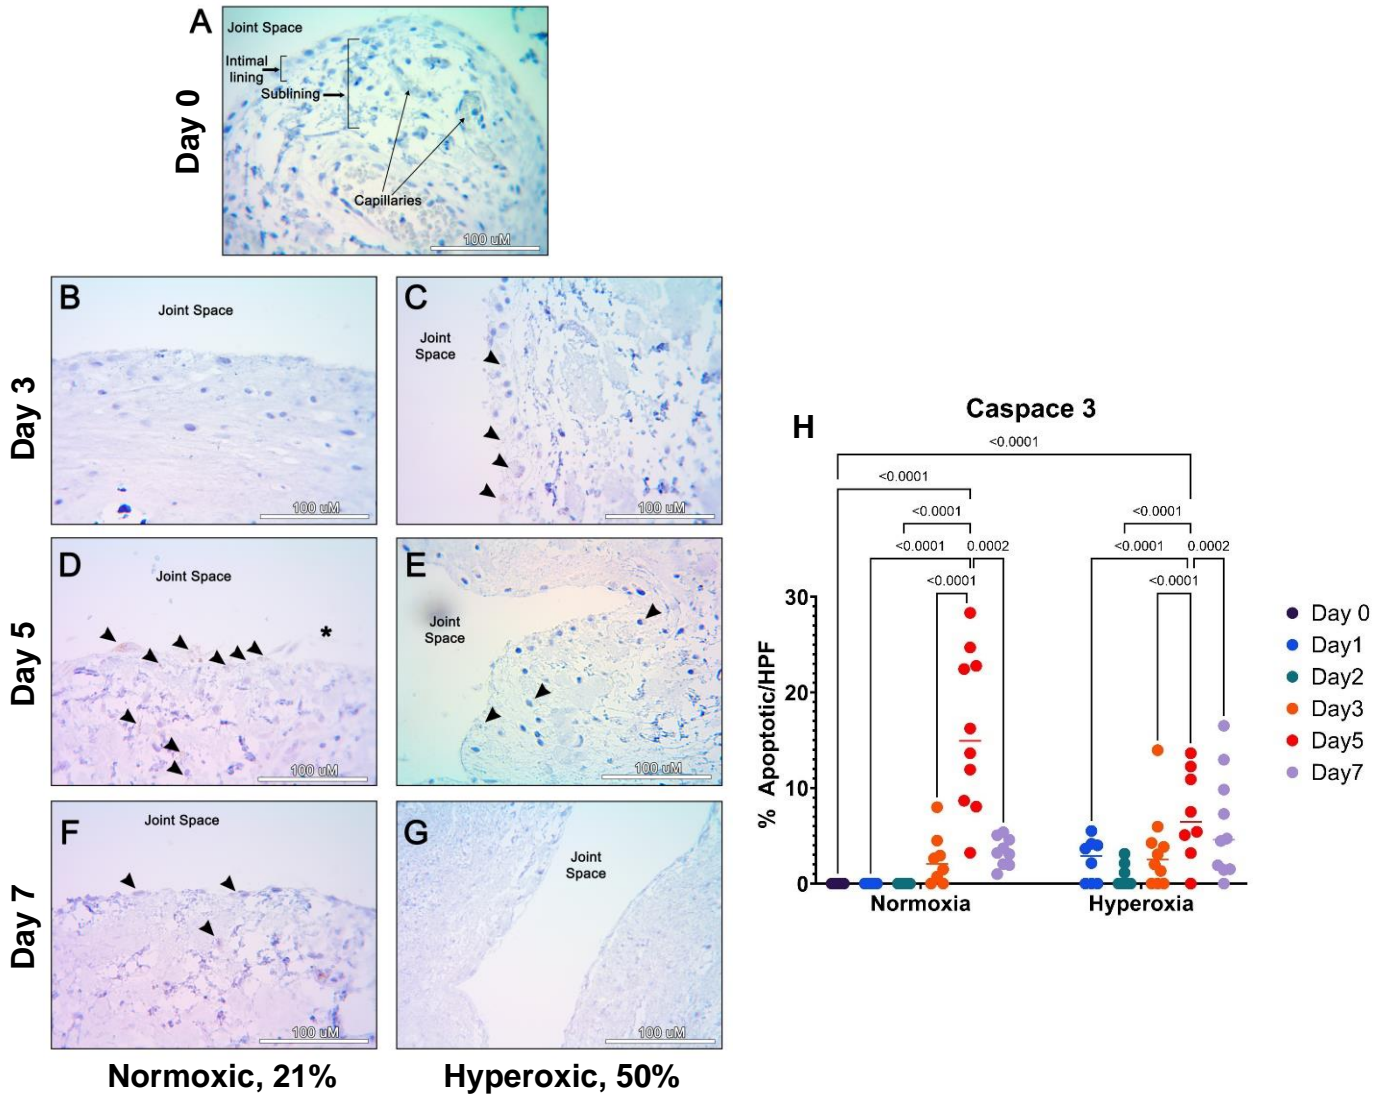

**Supplemental Figure 4:** Caspase-3 IHC and quantification for explant culture out to 7 days in normoxic (B, D, F) and hyperoxic (C, E, G) conditions. Arrowheads point out positive IHC for Caspase-3. Apoptosis became evident in normoxic conditions on day 3 of culture, compared to day 1 for hyperoxic conditions. Two-way ANOVA with Tukey's *post-hoc* correction (H).

## Resident Synovial Macrophages in Synovial Fluid

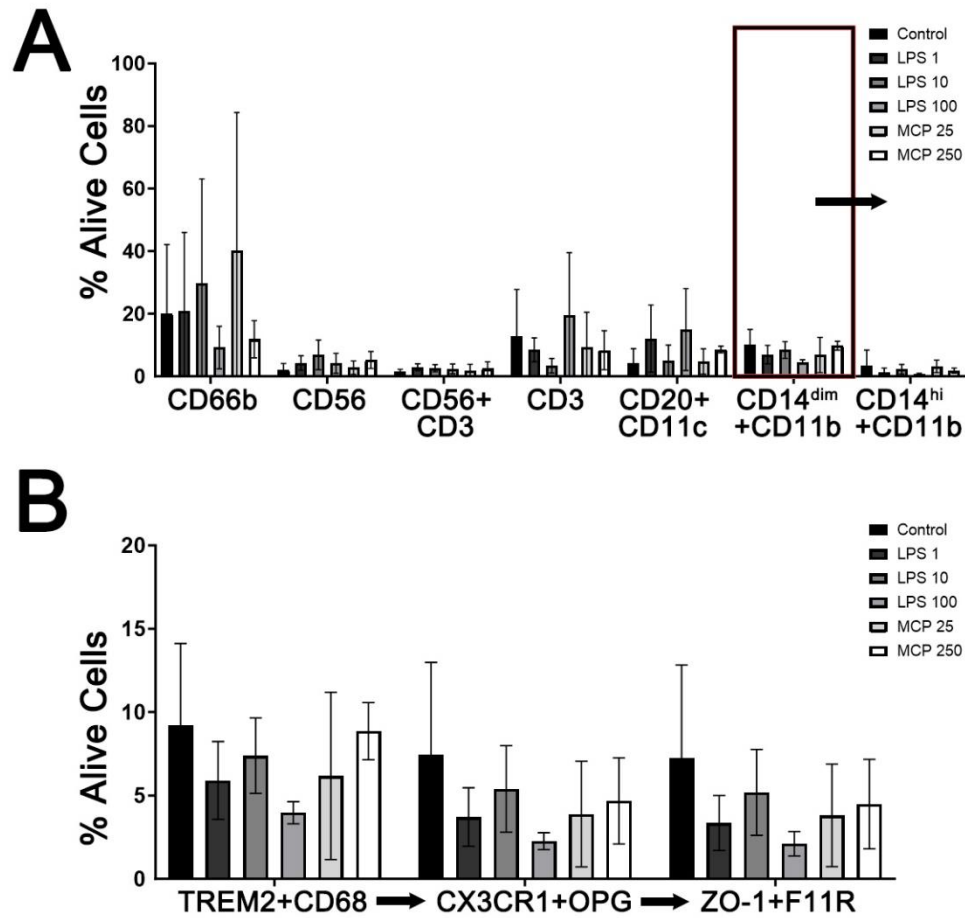

**Supplementary Figure 5:** Evaluation of migratory cell populations in the bottom transwell. Neutrophils (CD66b), NK (CD56), NKT (CD3 and CD56), T cells (CD3), B cells or Dendritic Cells (CD20 and CD11c, same fluorophore), and CD14 high or dim myeloid (CD11b) cells (A). Sequential analysis of the CD14<sup>dim</sup> myeloid population demonstrating nearly all CD14<sup>dim</sup> macrophages are positive for OPG, CX3CR1, ZO-1, and F11R (B). LPS in  $\mu\text{g/mL}$ , MCP-1 in  $\text{ng/mL}$ .

Resident Synovial Macrophages in Synovial Fluid

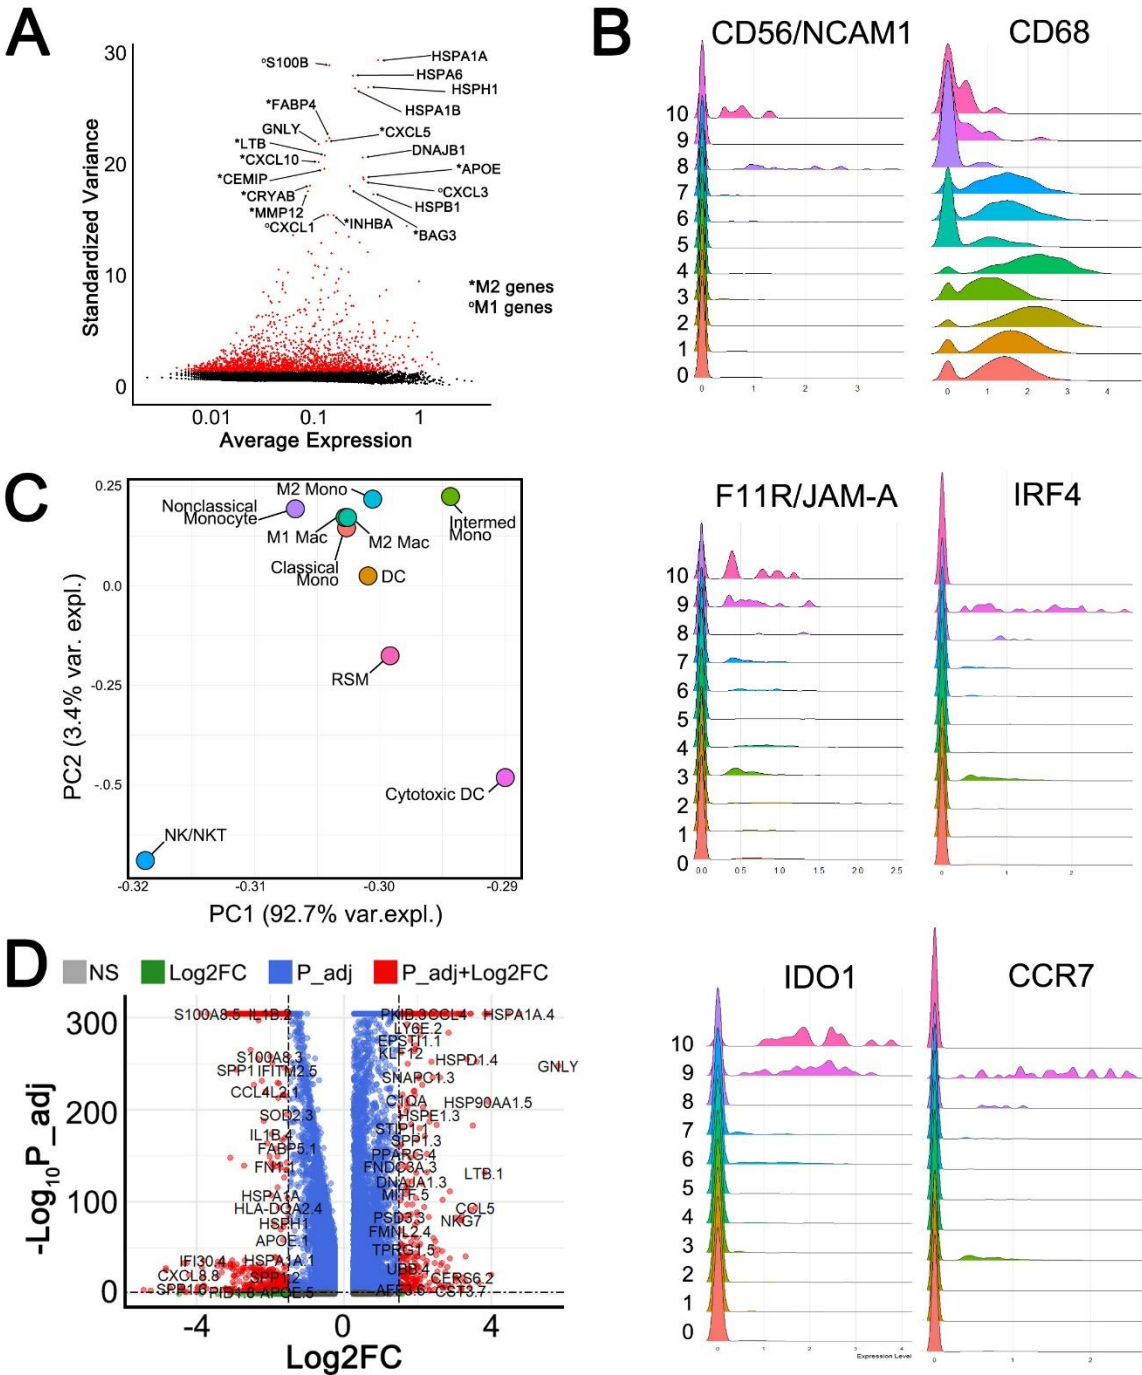

**Supplemental Figure 6:** Evaluation of scRNA-seq data. Variance analysis with top 20 genes labeled (A). Ridge plots of NK, M2, and RSM associated genes (B). Principle component analysis of all 10 clusters not including dead cells (C). Volcano plot of most up- and down-regulated genes, where minimum Log2FC was 1.5 for significance given homogeneity of sample (D).

Resident Synovial Macrophages in Synovial Fluid

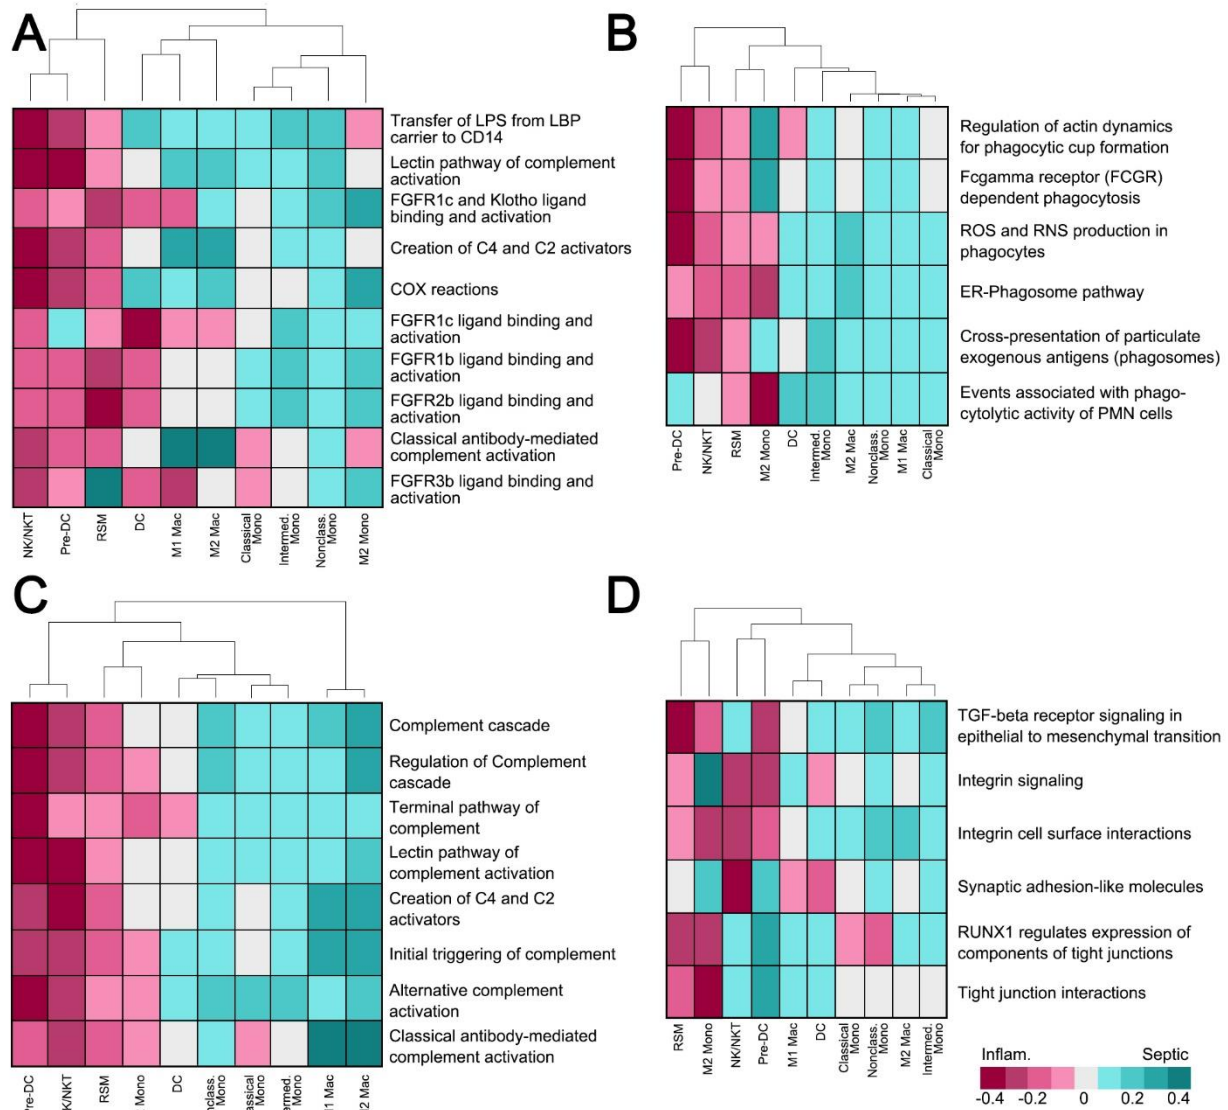

**Supplemental Figure 7:** GSA for top 10 immune-relevant pathways (A), phagocytosis (B), complement (C), and adhesion-related (D).

## Resident Synovial Macrophages in Synovial Fluid

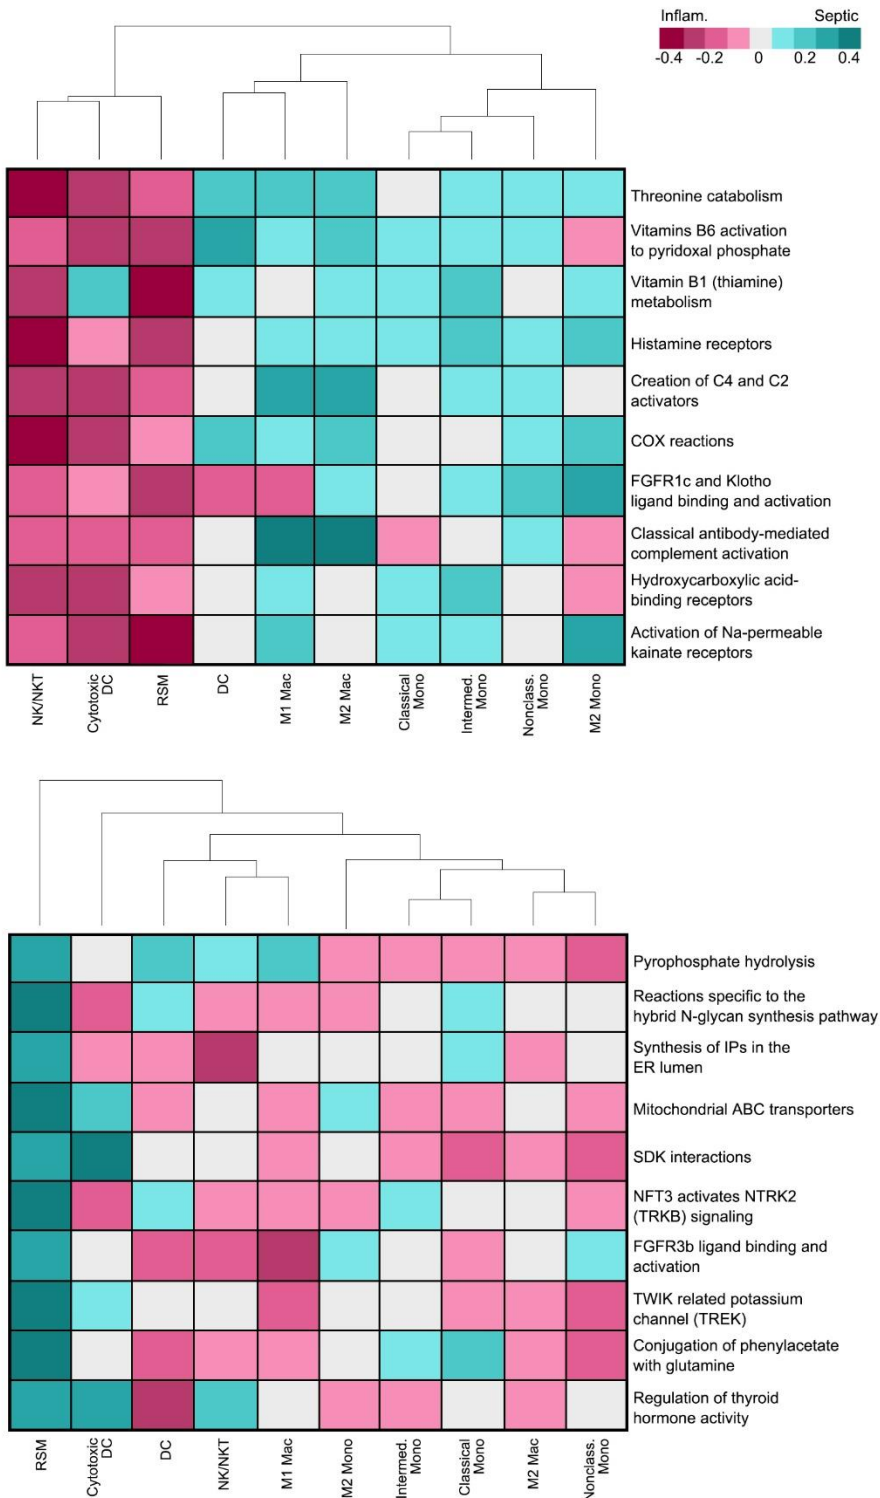

**Supplemental Figure 8:** GSA for RSMs: top ten genes upregulated in inflammatory arthritis (top) and septic arthritis (bottom).
